# Supplementary material for: Azide molecule mediated electrolyte engineering for selective photoelectrochemical azo coupling and efficient and stable water splitting
Source: Royal Society of Chemistry journal article supplement (doi:10.1039/d2ta04559a), 2022-01-01
Supplement: d2ta04559a1.pdf [file d2ta04559a1.pdf]

## Supporting Information

**Azide molecule mediated electrolyte engineering for selective photoelectrochemical azo coupling and efficient and stable water splitting**

Shutao Li<sup>a</sup>, Min Li<sup>b</sup>, Fang Chen<sup>a</sup>, Hongwei Huang<sup>a\*</sup>

<sup>a</sup> Beijing Key Laboratory of Materials Utilization of Nonmetallic Minerals and Solid Wastes, School of Materials Science and Technology, China University of Geosciences, Beijing 100083, P. R. China

<sup>b</sup> Department of Chemistry, Tsinghua University, Beijing 100084, P.R. China

**\*Corresponding author.** *E-mail address:* hhw@cugb.edu.cn

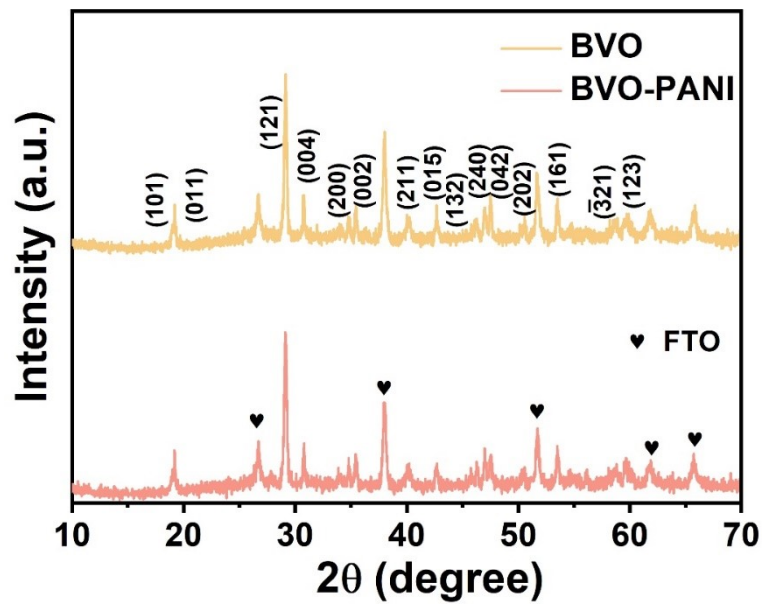

Figure S1. XRD pattern of BVO and BVO-PANI.

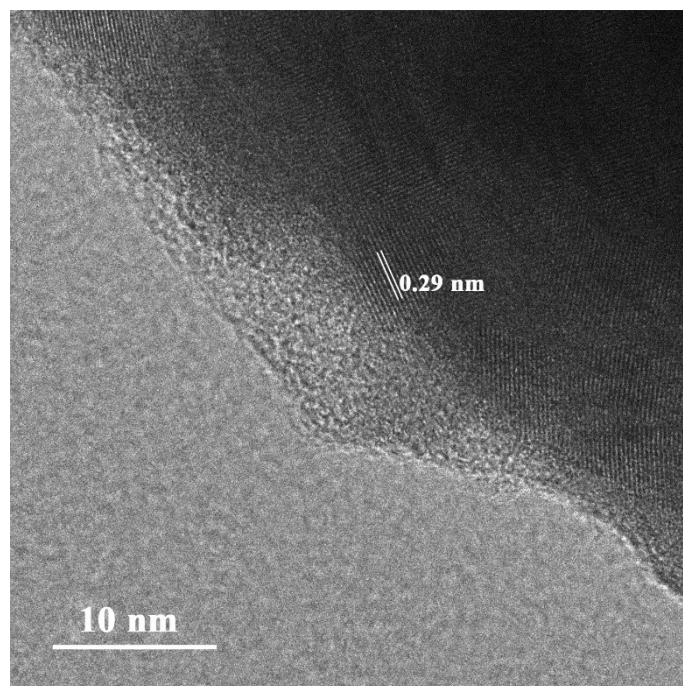

Figure S2. HRTEM image of BVO-PANI

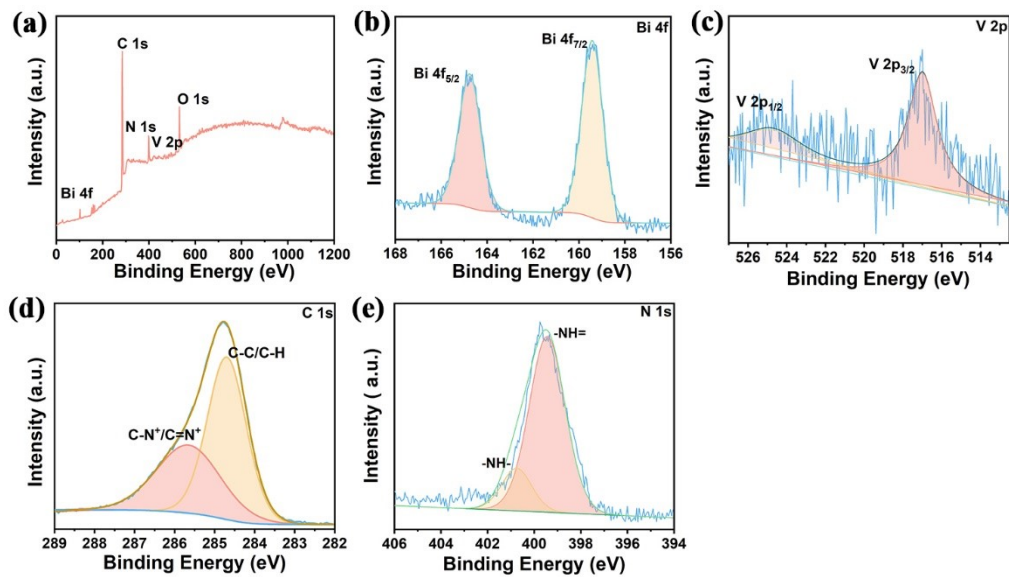

**Figure S3.** (a) Survey XPS spectra of BVO-PANI photoanode and high-resolution XPS spectra of (b) Bi 4f, (c) V2p, (d) C1s and (e) N 1s.

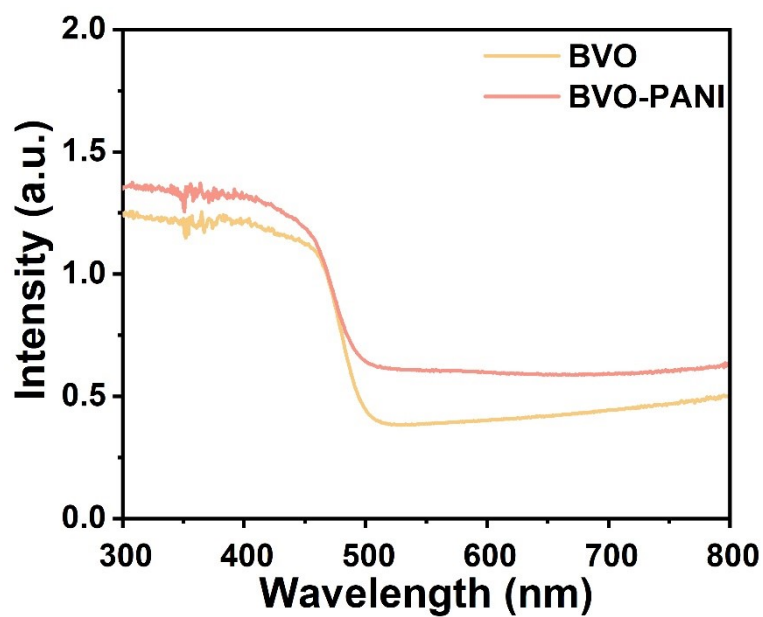

**Figure S4.** UV-vis DRS spectra of BVO and BVO-PANI photoanodes.

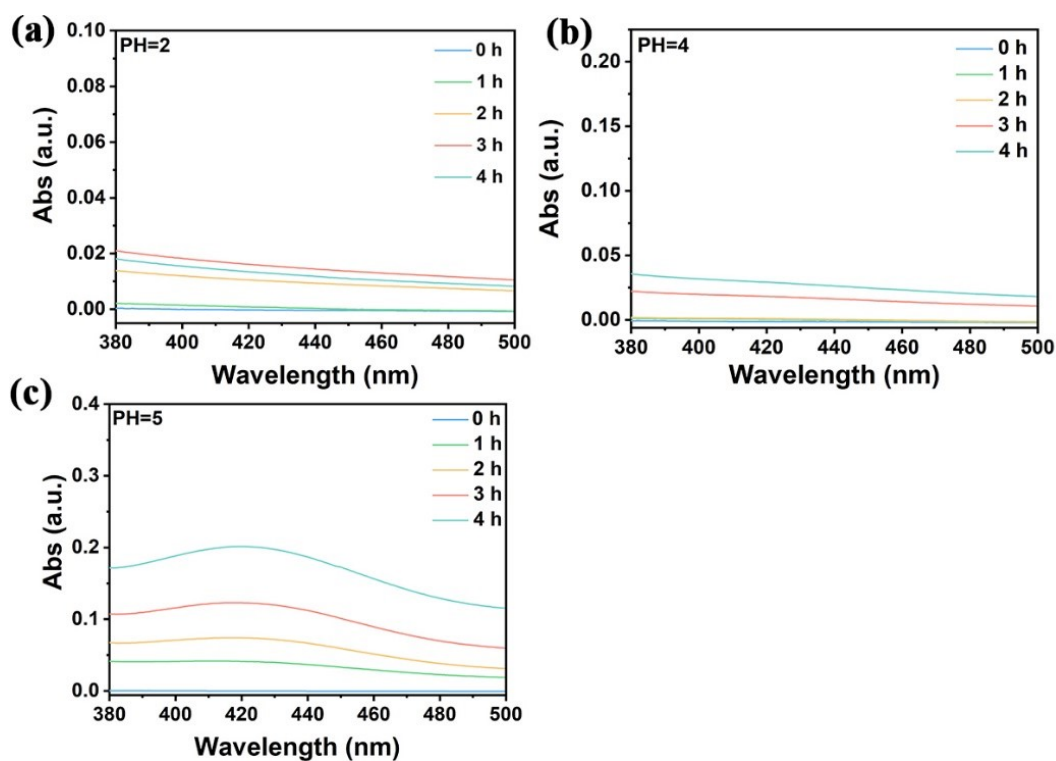

**Figure S5.** The UV-Vis absorption spectra of 5AT/Na<sub>2</sub>SO<sub>4</sub> at (c) pH=2, (b) pH=4 and (c) pH=5 before and after PEC reaction.

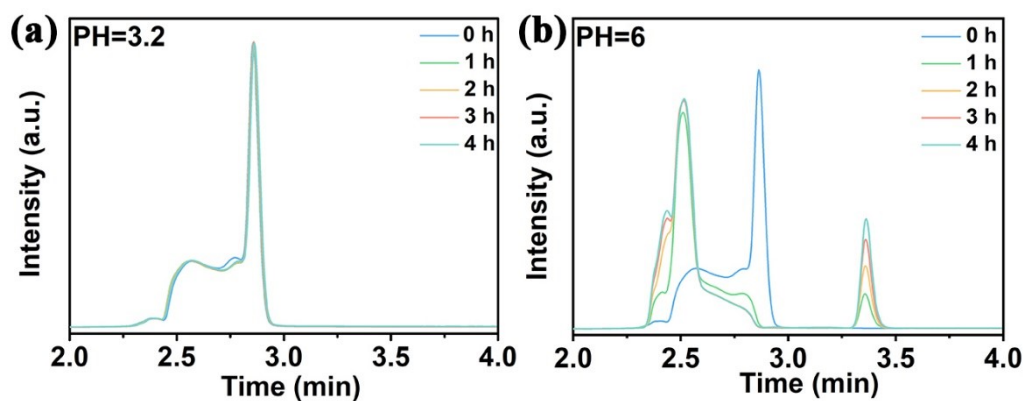

**Figure S6.** The HPLC spectra of 5AT/Na<sub>2</sub>SO<sub>4</sub> at pH=3.2 and pH=6 before and after PEC reaction.

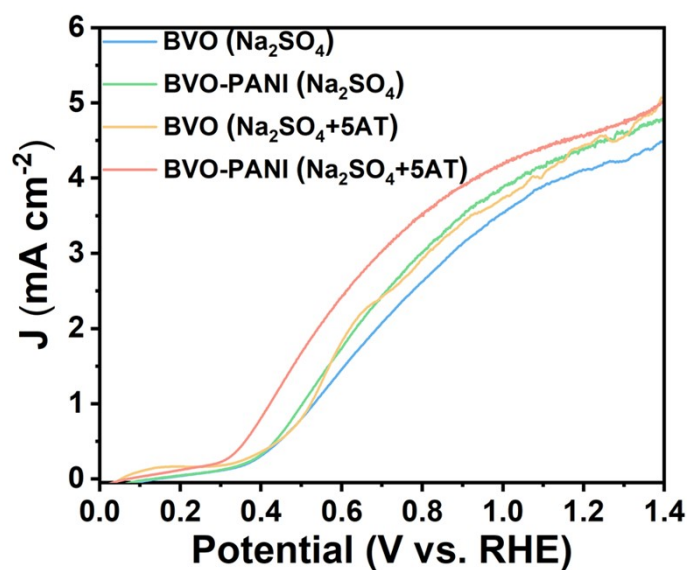

**Figure S7.** J-V plots of BVO and BVO-PANI photoanodes in  $\text{Na}_2\text{SO}_4$  and 5AT/ $\text{Na}_2\text{SO}_4$  electrolyte solution with 0.1 M  $\text{Na}_2\text{SO}_3$ .

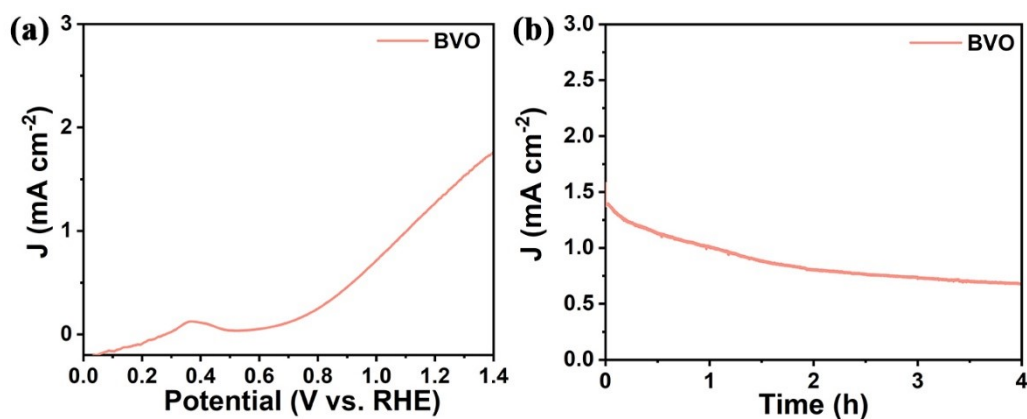

**Figure S8.** J-V and J-t curves of BVO photoanode in 0.1M  $\text{Na}_2\text{SO}_4$  acidified with 0.1 M dilute  $\text{H}_2\text{SO}_4$  (PH=3.2).

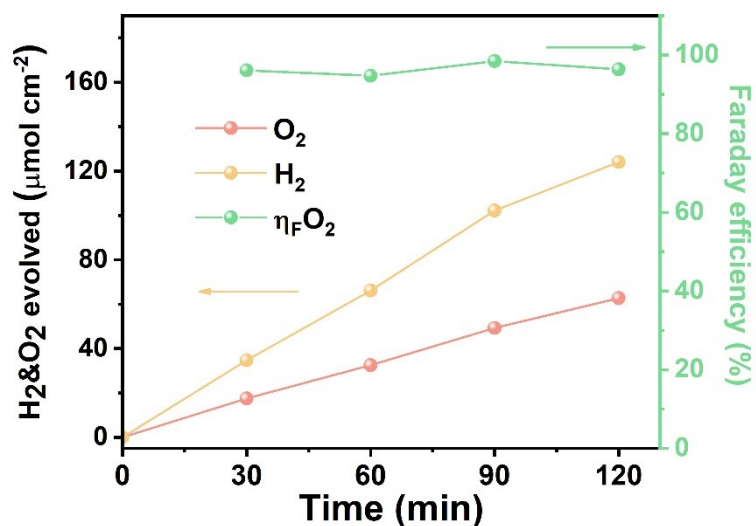

**Figure S9.** The actual amount of H<sub>2</sub> and O<sub>2</sub> produced by BVO in 5AT solution under AM1.5G illumination at 1.23V<sub>RHE</sub>.

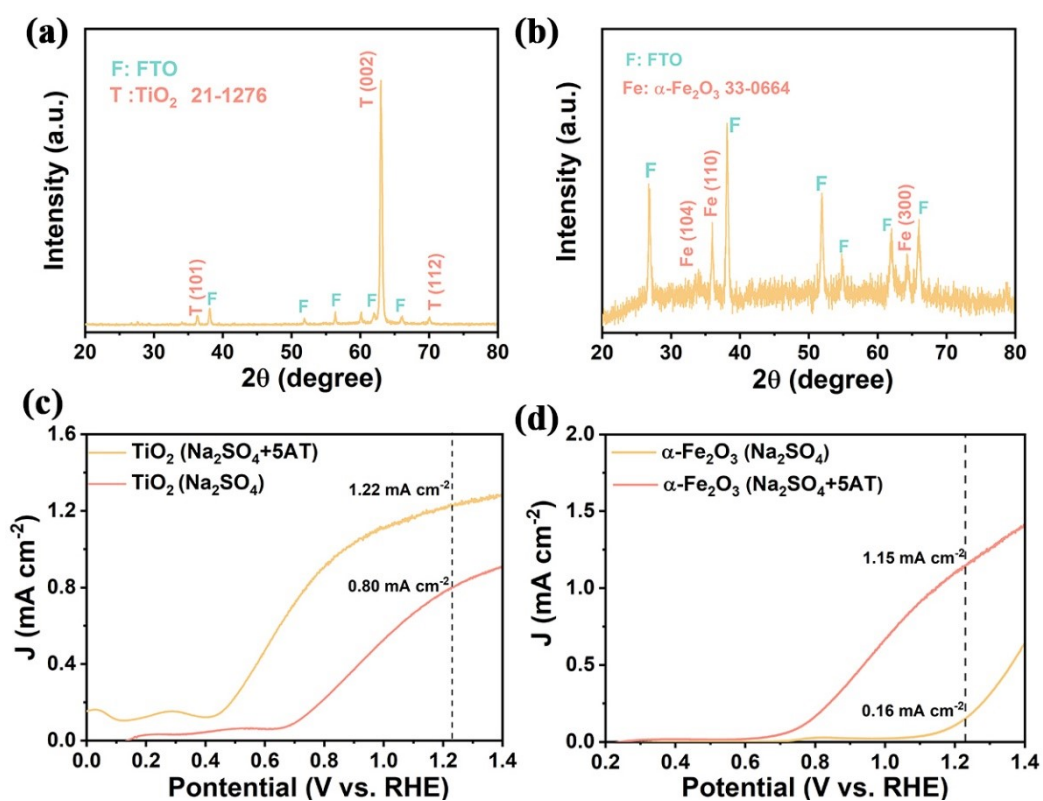

**Figure S10.** XRD images of (a) TiO<sub>2</sub> and (b) α-Fe<sub>2</sub>O<sub>3</sub> photoanodes. J-V plots of (c) TiO<sub>2</sub> and (d) α-Fe<sub>2</sub>O<sub>3</sub> photoanodes in Na<sub>2</sub>SO<sub>4</sub> and 5AT/Na<sub>2</sub>SO<sub>4</sub> electrolyte solution.

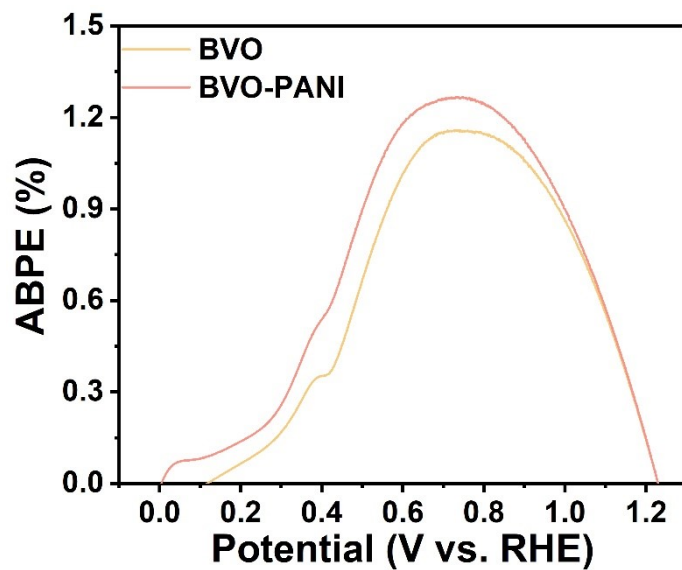

**Figure S11.** ABPE of BVO and BVO-PANI in 5AT/NaVO<sub>3</sub>/Na<sub>2</sub>SO<sub>4</sub>.

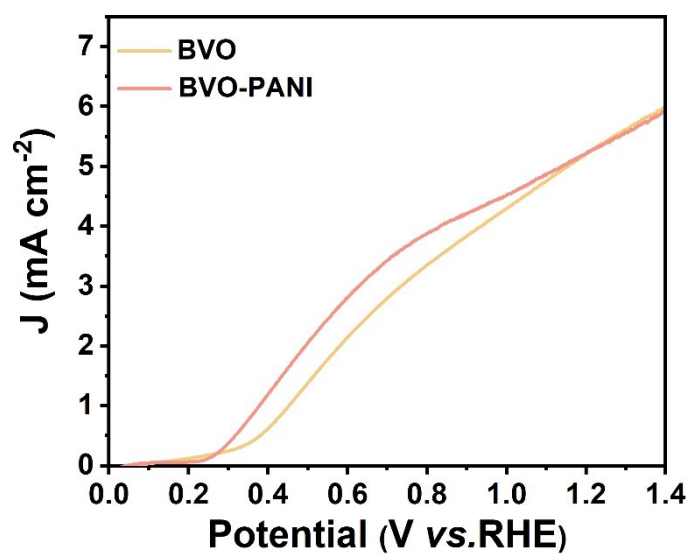

**Figure S12.** J-V plots of BVO and BVO-PANI photoanodes in 5AT/NaVO<sub>3</sub>/Na<sub>2</sub>SO<sub>4</sub> electrolyte solution with 0.1 M Na<sub>2</sub>SO<sub>3</sub>.

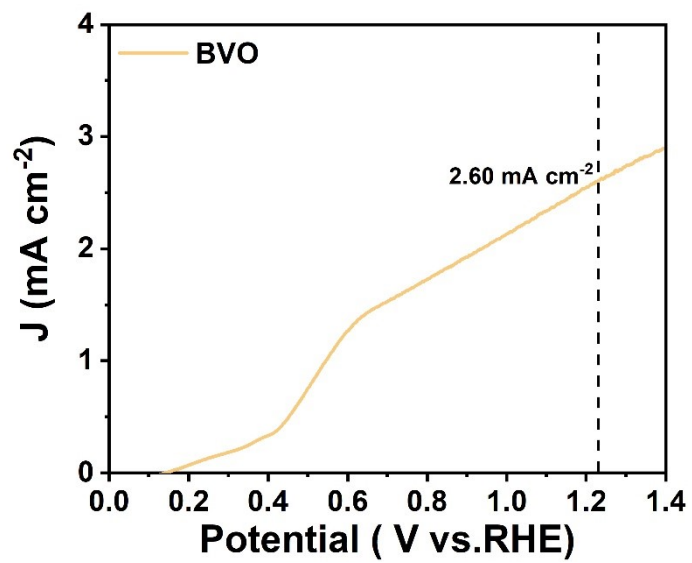

**Figure S13.** J-V curve of BVO in NaVO<sub>3</sub>/Na<sub>2</sub>SO<sub>4</sub> electrolyte solution.



**Table S1.** Onset potentials and photocurrent densities at  $1.23V_{\text{RHE}}$  of BVO photoanode in  $\text{Na}_2\text{SO}_4+5\text{AT}$  electrolyte solutions with different pH.

| Electrolyte                                  | Onset potential       | J ( $\text{mA cm}^{-2}$ ) at $1.23V_{\text{RHE}}$ |
|----------------------------------------------|-----------------------|---------------------------------------------------|
| $\text{Na}_2\text{SO}_4+5\text{AT}$ (pH=2)   | $0.4 V_{\text{RHE}}$  | 3.71                                              |
| $\text{Na}_2\text{SO}_4+5\text{AT}$ (pH=3.2) | $0.36 V_{\text{RHE}}$ | 3.60                                              |
| $\text{Na}_2\text{SO}_4+5\text{AT}$ (pH=4)   | $0.32 V_{\text{RHE}}$ | 3.45                                              |
| $\text{Na}_2\text{SO}_4+5\text{AT}$ (pH=5)   | $0.32 V_{\text{RHE}}$ | 3.64                                              |
| $\text{Na}_2\text{SO}_4+5\text{AT}$ (pH=6)   | $0.32 V_{\text{RHE}}$ | 3.93                                              |

**Table S2.** Fitting results of Electrochemical Impedance Spectra (at  $1.23V_{\text{RHE}}$ , AM 1.5G irradiation).

| Photoanode | Electrolyte                                     | $R_s$ ( $\Omega$ ) | $R_{\text{ct}}$ ( $\Omega$ ) |
|------------|-------------------------------------------------|--------------------|------------------------------|
| BVO        | $\text{Na}_2\text{SO}_4$ (pH=6.8)               | 34.51              | 178.7                        |
| BVO-PANI   | $\text{Na}_2\text{SO}_4$ (pH=6.8)               | 34.29              | 169.1                        |
| BVO        | $\text{Na}_2\text{SO}_4+5\text{AT}$<br>(pH=3.2) | 38.0               | 116.8                        |
| BVO-PANI   | $\text{Na}_2\text{SO}_4+5\text{AT}$<br>(pH=3.2) | 35.44              | 101.5                        |

**Table S3** Recent reports on electrolyte composition regulation to promote PEC water splitting of BiVO<sub>4</sub> (BVO) photoanode.

| Photoanode               | Electrolyte                                          | Onset potential       | J (mA cm <sup>-2</sup> ) at 1.23 V <sub>RHE</sub> | Stability                         | Reference |
|--------------------------|------------------------------------------------------|-----------------------|---------------------------------------------------|-----------------------------------|-----------|
| NiFe<br>OER/Mo:BVO/Ni/Sn | 1 M KBi+Fe <sup>2+</sup>                             | 0.17 V <sub>RHE</sub> | 2.6<br>(0.6 V <sub>RHE</sub> )                    | 1100 h<br>(0.6 V <sub>RHE</sub> ) | [1]       |
| Etched-NiOOH/BVO         | 1 M KBi+Fe <sup>2+</sup>                             | 0.3 V <sub>RHE</sub>  | 5.43                                              | 200 h<br>(0.8 V <sub>RHE</sub> )  | [2]       |
| BVO/FeOOH/NiOOH          | 1 M KBi+0.1 M V <sub>2</sub> O <sub>5</sub> (pH=9.3) | 0.24 V <sub>RHE</sub> | 4.8                                               | 500 h<br>(0.6 V <sub>RHE</sub> )  | [3]       |
| β-FeOOH-B-BVO            | 0.5 M KBi+0.1M NaVO <sub>3</sub> (pH=9.3)            | 0.28 V <sub>RHE</sub> | 4.96                                              | 20 h<br>(1.23 V <sub>RHE</sub> )  | [4]       |
| BVO/Co-Sil               | 0.5 M KBi+0.1M NaVO <sub>3</sub> (pH=9.5)            | 0.22 V <sub>RHE</sub> | 5.0                                               | 20 h<br>(1.23 V <sub>RHE</sub> )  | [5]       |
| Ov-BVO@NiFe-MOFs         | 0.5 M KBi+0.05 V <sub>2</sub> O <sub>5</sub> (pH=9)  |                       | 5.3±0.15                                          | 10 h<br>(0.7 V <sub>RHE</sub> )   | [6]       |

## Reference

- [1] Y. Kuang, Q. Jia, G. Ma, T. Hisatomi, T. Minegishi, H. Nishiyama, M. Nakabayashi, N. Shibata, T. Yamada, A. Kudo, K. Domen, *Nature Energy* **2016**, *2*, 16191.
- [2] R.-T. Gao, D. He, L. Wu, K. Hu, X. Liu, Y. Su, L. Wang, *Angewandte Chemie International Edition* **2020**, *59*, 6213.
- [3] D. K. Lee, K.-S. Choi, *Nature Energy* **2018**, *3*, 53.
- [4] Z. Kang, X. Lv, Z. Sun, S. Wang, Y.-Z. Zheng, X. Tao, *Chemical Engineering Journal* **2021**, *421*, 129819.
- [5] Q. Sun, T. Cheng, Z. Liu, L. Qi, *Applied Catalysis B: Environmental* **2020**, *277*, 119189.
- [6] J.-B. Pan, B.-H. Wang, J.-B. Wang, H.-Z. Ding, W. Zhou, X. Liu, J.-R. Zhang, S. Shen, J.-K. Guo, L. Chen, C.-T. Au, L.-L. Jiang, S.-F. Yin, *Angewandte Chemie International Edition* **2021**, *60*, 1433.
